# Supplementary material for: Theoretical investigation and design of high-efficiency dithiafulvenyl-based sensitizers for dye-sensitized solar cells: the impacts of elongating π-spacers and rigidifying dithiophene
Source: Royal Society of Chemistry journal article supplement (doi:10.1039/c4cp00968a), 2014-01-01
Supplement: c4cp00968a1.pdf [file c4cp00968a1.pdf]

## Supporting Information

Theoretical investigation and design of high-efficiency  
dithiafulvenyl-based sensitizers for dye-sensitized solar cells:  
The impacts of elongating  $\pi$ -spacers and rigidifying dithiophene

Wei Li, Jian Wang, Jie Chen, Fu-Quan Bai\*, and Hong-Xing Zhang\*

State Key Laboratory of Theoretical and Computational Chemistry,

Institute of Theoretical Chemistry, Jilin University,

Changchun 130023, People's Republic of China

\* E-mail: [baifq@jlu.edu.cn](mailto:baifq@jlu.edu.cn) (Fu-Quan Bai) and [zhanghx@mail.jlu.edu.cn](mailto:zhanghx@mail.jlu.edu.cn) (Hong-Xing Zhang).

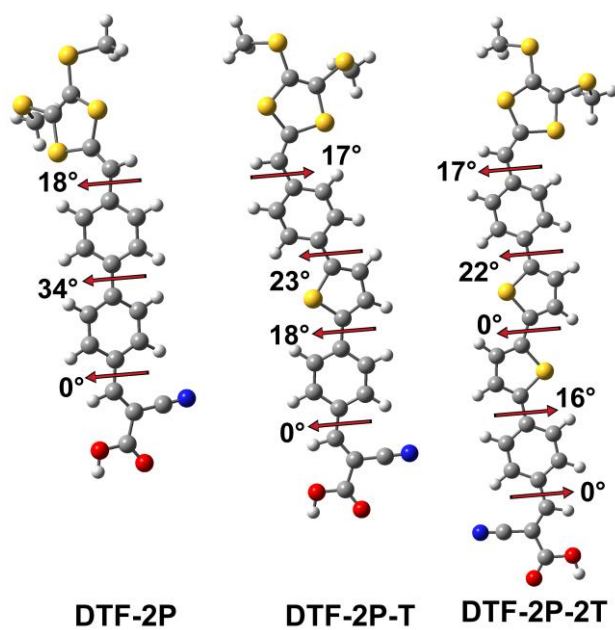

**Figure S1** Optimized ground state geometries along with the selected dihedral angle values of of DTF-2P, DTF-2P-T, and DTF-2P-2T.

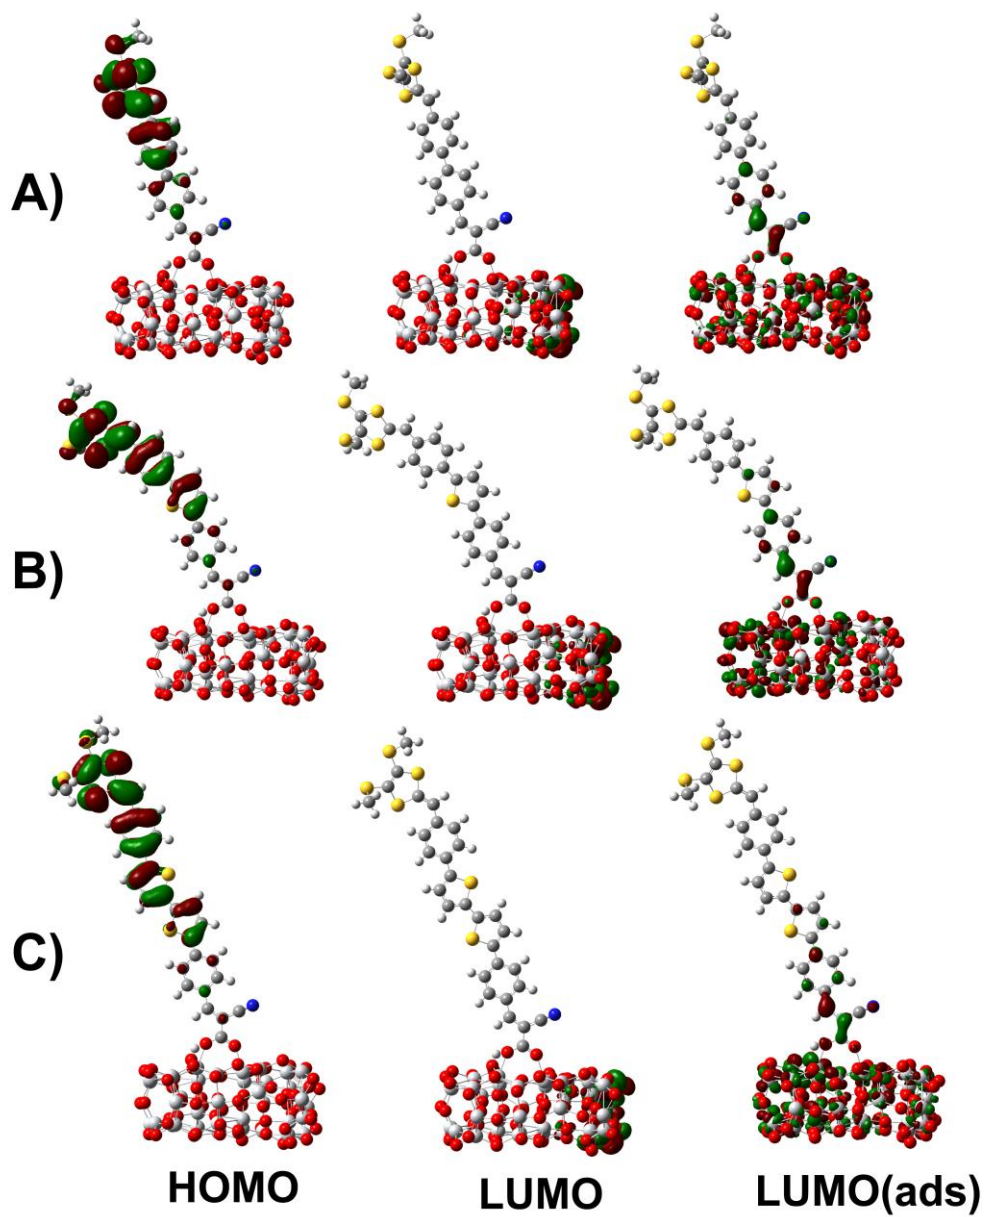

**Figure S2** Selected molecular orbitals for the HOMO , LUMO , and LUMO(ads) of DTF-2P/TiO<sub>2</sub>

(A), DTF-2P-T/TiO<sub>2</sub> (B), and DTF-2P-2T/TiO<sub>2</sub> (C) systems. (LUMO(ads) refers to the dye contribution to the LUMOs of dye/TiO<sub>2</sub> system)

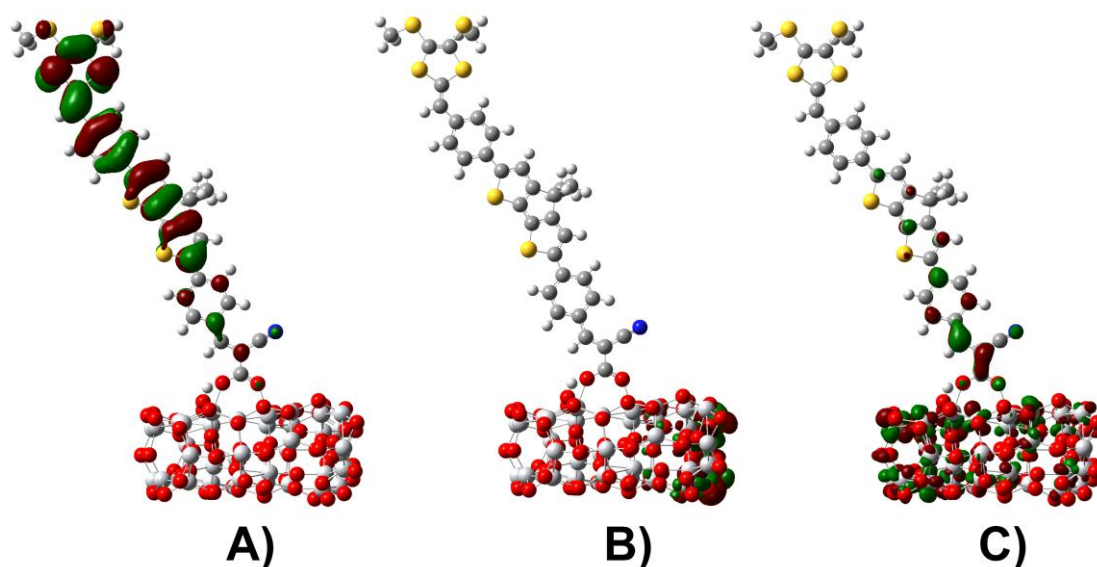

**Figure S3** Some selected molecular orbitals for the HOMO (A), LUMO (B), and LUMO(ads) (C) of DTF-2P-2T-C/TiO<sub>2</sub> systems.

**Table S1.** Basis set effect on the maximum absorption wavelength (nm/eV) for DTF-2P and DTF-2P-T

| Dyes      | 6-31G(d) | 6-311+G(d,p) | expt <sup>1</sup> |
|-----------|----------|--------------|-------------------|
| DTF-2P    | 397/3.13 | 415/2.99     | 406/3.05          |
| DTF-2P-2T | 434/2.86 | 452/2.74     | 427/2.90          |

**Table S2.** Comparison of the excitation energies (nm/eV) for DTF-2P and DTF-2P-T, calculated within TDDFT using different functionals (BhandH and CAM-B3LYP) with 6-31G(d) basis set in THF solution.

|          | BHandH   | CAM-B3LYP | expt. <sup>1</sup> |
|----------|----------|-----------|--------------------|
| DTF-2P   | 397/3.13 | 387/3.20  | 406/3.05           |
| DTF-2P-T | 434/2.86 | 424/2.92  | 427/2.90           |

**Table S3** Absorption spectra data for the designed dyes (DTF-2P-2T-C, DTF-2P-2T-Bi, DTF-2P-2T-S)

|              | $\lambda_{max}$ (nm/eV) | $f$    | assign.   |
|--------------|-------------------------|--------|-----------|
| DTF-2P-2T-C  | 498/2.49                | 2.5955 | H→L (75%) |
| DTF-2P-2T-S  | 453/2.73                | 2.7152 | H→L (62%) |
| DTF-2P-2T-Bi | 443/2.80                | 2.5658 | H→L (63%) |

1. K. P. Guo; K. Y. Yan; X. Q. Lu; Y. C. Qiu; Z. K. Liu; J. W. Sun; F. Yan; W. Y. Guo; S. H. Yang, *Org Lett* 2012, **14**, 2214.

Cartesian coordinates:

DTF-2P

0 1

|   |             |             |             |
|---|-------------|-------------|-------------|
| C | 1.04236300  | -1.92715700 | -0.13250600 |
| C | -0.31376700 | -2.21167200 | -0.17713100 |
| C | -1.26742100 | -1.23036700 | -0.52615500 |
| C | -0.77649700 | 0.04732800  | -0.86477900 |
| C | 0.58407800  | 0.32871000  | -0.82648900 |
| C | 1.52711800  | -0.64479200 | -0.45353300 |
| H | 1.74141100  | -2.71809300 | 0.12338600  |
| H | -0.65501600 | -3.21510000 | 0.06560200  |
| H | -1.45395000 | 0.82839200  | -1.19138900 |
| H | 0.91809700  | 1.33268800  | -1.07217700 |
| C | 7.16487000  | 0.60175000  | -0.36937900 |
| C | 8.23438700  | 0.20613200  | 0.38119700  |
| H | 7.41059800  | 1.32220300  | -1.14471900 |
| C | 9.60030000  | 0.73923800  | 0.12647200  |
| O | 10.58670900 | 0.42362200  | 0.75658200  |
| O | 9.64244300  | 1.63088500  | -0.89840000 |
| H | 10.57600600 | 1.90291400  | -0.96665500 |
| C | -2.67375300 | -1.61130400 | -0.52394900 |
| C | -3.78834400 | -0.84033300 | -0.50950000 |
| H | -2.84964500 | -2.68604500 | -0.50991600 |
| C | 8.16739800  | -0.73307900 | 1.45748300  |
| N | 8.09885400  | -1.49905600 | 2.33105000  |
| S | -5.40402600 | -1.58806500 | -0.60754300 |
| S | -3.88901900 | 0.93187500  | -0.43085900 |
| C | -6.32319900 | -0.15015200 | -0.10937400 |
| C | -5.62799400 | 1.01065000  | -0.03016000 |
| S | -8.07461300 | -0.29981400 | 0.08322900  |
| S | -6.30848700 | 2.60875200  | 0.29527600  |
| C | -8.21139700 | -1.70426500 | 1.25971300  |
| H | -7.70069500 | -1.47773900 | 2.19806600  |
| H | -9.28199000 | -1.81834500 | 1.45004700  |
| H | -7.82437400 | -2.63203200 | 0.83375200  |
| C | -5.51839900 | 3.02326200  | 1.90301800  |
| H | -5.85555600 | 2.34058200  | 2.68586500  |
| H | -4.42930400 | 3.00287500  | 1.82653800  |
| H | -5.84373500 | 4.03937200  | 2.14205600  |
| C | 2.97242700  | -0.33906700 | -0.41225900 |
| C | 3.55403400  | 0.56761800  | -1.31872400 |
| C | 3.81913400  | -0.94651700 | 0.53708200  |
| C | 4.91097600  | 0.84723600  | -1.27347800 |

|   |            |             |             |
|---|------------|-------------|-------------|
| H | 2.93918700 | 1.03255000  | -2.08314100 |
| C | 5.17720300 | -0.67111900 | 0.58646400  |
| H | 3.39601700 | -1.62746000 | 1.26914900  |
| C | 5.76089200 | 0.23776300  | -0.32400600 |
| H | 5.33634100 | 1.54370400  | -1.99201500 |
| H | 5.78326800 | -1.15628800 | 1.34105800  |

DTF-2P-T

0 1

|   |              |             |             |
|---|--------------|-------------|-------------|
| C | -1.09278500  | -0.42664500 | -0.27281800 |
| C | -2.46384300  | -0.42293700 | -0.49601600 |
| C | -3.22650200  | -1.60383400 | -0.38604000 |
| C | -2.52523700  | -2.79140500 | -0.07851000 |
| C | -1.15709400  | -2.79744400 | 0.13701300  |
| C | -0.40399900  | -1.60822500 | 0.05603900  |
| H | -0.54772200  | 0.51060100  | -0.34673300 |
| H | -2.93269200  | 0.51073300  | -0.78545500 |
| H | -3.07707300  | -3.72586400 | -0.01059300 |
| H | -0.65600100  | -3.73730100 | 0.34819100  |
| C | 8.72737500   | 1.25322800  | -0.26014400 |
| C | 10.01236200  | 0.82178900  | -0.08946300 |
| H | 8.64744600   | 2.28555400  | -0.58957900 |
| C | 11.17166500  | 1.71794900  | -0.34567400 |
| O | 12.33188400  | 1.39301100  | -0.21004200 |
| O | 10.80476500  | 2.96129100  | -0.75479800 |
| H | 11.63961300  | 3.44648300  | -0.88809700 |
| C | -4.66757700  | -1.69004900 | -0.57723000 |
| C | -5.60999200  | -0.71584400 | -0.58421200 |
| C | 10.37564900  | -0.49234600 | 0.34094100  |
| N | 10.65585900  | -1.56583800 | 0.69292500  |
| S | -5.38332200  | 1.02405300  | -0.30274900 |
| S | -7.31296500  | -1.10774300 | -0.93841900 |
| C | -7.11122200  | 1.40798100  | -0.06194300 |
| C | -7.99803700  | 0.42453600  | -0.35110300 |
| S | -7.51339100  | 3.06699800  | 0.39525300  |
| S | -9.75687900  | 0.60652700  | -0.34298000 |
| C | -6.82583000  | 3.15518300  | 2.09802400  |
| H | -5.75489800  | 2.94217100  | 2.10546200  |
| H | -6.99094800  | 4.18272900  | 2.43325300  |
| H | -7.35291400  | 2.46756200  | 2.76281000  |
| C | -10.28432200 | -0.83861600 | 0.66162000  |
| H | -10.02493100 | -1.78417300 | 0.18145900  |
| H | -9.85351400  | -0.79367300 | 1.66413800  |
| H | -11.37256900 | -0.76038900 | 0.73247900  |

|   |             |             |             |
|---|-------------|-------------|-------------|
| C | 4.84385000  | -0.52642100 | 0.20495700  |
| C | 5.02139800  | 0.81136300  | -0.20296800 |
| C | 6.00466000  | -1.29104900 | 0.45857700  |
| C | 6.28984700  | 1.34839300  | -0.34464700 |
| H | 4.15527800  | 1.43853800  | -0.39303600 |
| C | 7.27304400  | -0.75327000 | 0.32613800  |
| H | 5.90646300  | -2.33281200 | 0.74606700  |
| C | 7.45185500  | 0.58879400  | -0.08241000 |
| H | 6.39588000  | 2.38410000  | -0.65774600 |
| H | 8.13036000  | -1.38204900 | 0.53034800  |
| C | 1.03737600  | -1.62376200 | 0.29966500  |
| C | 1.77827700  | -2.54159700 | 1.01855800  |
| S | 2.09292500  | -0.38864400 | -0.35613600 |
| C | 3.16313300  | -2.25785400 | 1.05408400  |
| H | 1.33024900  | -3.38016200 | 1.53972400  |
| C | 3.51932100  | -1.11469600 | 0.36499400  |
| H | 3.87586500  | -2.86109600 | 1.60533300  |
| H | -5.04424000 | -2.70289300 | -0.71387800 |

DTF-2P-2T

0 1

|   |              |             |             |
|---|--------------|-------------|-------------|
| C | 2.73602600   | -1.72219500 | 0.15599200  |
| C | 4.08439700   | -2.04055400 | 0.12683400  |
| C | 5.05714700   | -1.11928200 | -0.31904200 |
| C | 4.58962900   | 0.13143800  | -0.77529400 |
| C | 3.23824700   | 0.44832900  | -0.75410900 |
| C | 2.27619100   | -0.46283300 | -0.27716400 |
| H | 2.02836000   | -2.45265300 | 0.53898900  |
| H | 4.40563400   | -3.01895600 | 0.47558200  |
| H | 5.27799200   | 0.85356400  | -1.20023600 |
| H | 2.91746800   | 1.40862100  | -1.14655600 |
| C | -11.16143300 | 0.93590200  | -0.01437000 |
| C | -12.32887700 | 0.27930400  | 0.25546700  |
| H | -11.29331200 | 1.97995300  | -0.28488700 |
| C | -13.64361900 | 0.97024200  | 0.17419100  |
| O | -14.71091000 | 0.44080300  | 0.39936000  |
| O | -13.53825900 | 2.27754400  | -0.18343200 |
| H | -14.45259000 | 2.61486400  | -0.20244900 |
| C | 6.45449500   | -1.52840000 | -0.29047900 |
| C | 7.58484200   | -0.78439100 | -0.36543900 |
| H | 6.60904500   | -2.59986700 | -0.16984700 |
| C | -12.41629200 | -1.09734300 | 0.63121800  |
| N | -12.47151400 | -2.21934300 | 0.93599900  |
| S | 9.18512600   | -1.57030800 | -0.40622100 |

|   |              |             |             |
|---|--------------|-------------|-------------|
| S | 7.72101100   | 0.98477500  | -0.47002200 |
| C | 10.13618400  | -0.10877500 | -0.05755900 |
| C | 9.46431700   | 1.06792600  | -0.08986000 |
| S | 11.88546700  | -0.27764700 | 0.13959800  |
| S | 10.17735200  | 2.67693600  | 0.07321400  |
| C | 11.99756600  | -1.51758600 | 1.49076100  |
| H | 11.57047400  | -2.47849300 | 1.19717200  |
| H | 13.06692600  | -1.64451400 | 1.67993000  |
| H | 11.51211400  | -1.14987600 | 2.39730700  |
| C | 9.40029800   | 3.26481800  | 1.63240900  |
| H | 8.31077600   | 3.25741100  | 1.56004600  |
| H | 9.72704300   | 2.65733200  | 2.47908700  |
| H | 9.74536900   | 4.29337300  | 1.76855100  |
| C | -7.00605000  | -0.16003600 | -0.06318100 |
| C | -7.45276500  | 1.13911700  | -0.38155600 |
| C | -7.98432300  | -1.11770100 | 0.28869100  |
| C | -8.80036600  | 1.45490800  | -0.35088300 |
| H | -6.73663900  | 1.90228600  | -0.67222000 |
| C | -9.33219300  | -0.80552800 | 0.31277200  |
| H | -7.67669500  | -2.12046700 | 0.56656700  |
| C | -9.78070800  | 0.49694500  | -0.00807500 |
| H | -9.11479500  | 2.46410800  | -0.60507600 |
| H | -10.04081000 | -1.57494200 | 0.59196100  |
| C | 0.86082500   | -0.10096400 | -0.24809200 |
| C | 0.29356200   | 1.15772100  | -0.23531700 |
| S | -0.39865800  | -1.32403400 | -0.23155900 |
| C | -1.12031800  | 1.15149600  | -0.20472800 |
| H | 0.88292200   | 2.06753700  | -0.21775100 |
| C | -1.67190000  | -0.11526500 | -0.19276000 |
| H | -1.71954700  | 2.05583500  | -0.18033400 |
| C | -3.06146800  | -0.50134400 | -0.15681200 |
| C | -3.61214000  | -1.77029200 | -0.13693000 |
| S | -4.33301400  | 0.70621600  | -0.12584300 |
| C | -5.02396400  | -1.77695100 | -0.09928600 |
| H | -3.01175200  | -2.67355300 | -0.15474600 |
| C | -5.59432700  | -0.51836300 | -0.09151600 |
| H | -5.60846600  | -2.68998400 | -0.10247600 |

DTF-2P-2T-C

0 1

|   |            |             |             |
|---|------------|-------------|-------------|
| C | 2.86623500 | -1.90873600 | 0.16435000  |
| C | 4.21226700 | -2.23388300 | 0.11649400  |
| C | 5.18571100 | -1.31243500 | -0.32750800 |
| C | 4.71994600 | -0.05349300 | -0.76239100 |



|   |              |             |             |
|---|--------------|-------------|-------------|
| C | 3.37054500   | 0.26985600  | -0.72443000 |
| C | 2.40710000   | -0.64181000 | -0.24922400 |
| H | 2.15955700   | -2.64056100 | 0.54665700  |
| H | 4.53148900   | -3.21846000 | 0.44946700  |
| H | 5.40785600   | 0.67033600  | -1.18536100 |
| H | 3.05152500   | 1.23618600  | -1.10329100 |
| C | -11.08702100 | -0.82825900 | 0.26000100  |
| C | -12.19777300 | -0.04391800 | 0.11535000  |
| H | -11.30706800 | -1.87037900 | 0.47486200  |
| C | -13.56678700 | -0.60729800 | 0.24766600  |
| O | -14.58815300 | 0.03655600  | 0.13251400  |
| O | -13.57256300 | -1.94062800 | 0.51580400  |
| H | -14.51368600 | -2.18637400 | 0.57845200  |
| C | 6.58086700   | -1.72966800 | -0.32017600 |
| C | 7.71453300   | -0.99097900 | -0.39586700 |
| H | 6.73058700   | -2.80385900 | -0.21885700 |
| C | -12.16810800 | 1.35688300  | -0.16767900 |
| N | -12.12646500 | 2.49727500  | -0.39772000 |
| S | 9.30972800   | -1.78523000 | -0.46961000 |
| S | 7.86011400   | 0.77914800  | -0.47145800 |
| C | 10.27267000  | -0.33608500 | -0.10251900 |
| C | 9.60747500   | 0.84482000  | -0.10604600 |
| S | 12.02291700  | -0.51770500 | 0.07365800  |
| S | 10.33134400  | 2.44642000  | 0.08071900  |
| C | 12.14251600  | -1.79421000 | 1.38961100  |
| H | 11.70997500  | -2.74562400 | 1.07390500  |
| H | 13.21307700  | -1.92928800 | 1.56593800  |
| H | 11.66610100  | -1.44991500 | 2.31004800  |
| C | 9.58003600   | 3.00450400  | 1.66328700  |
| H | 8.48949200   | 2.99884000  | 1.60794200  |
| H | 9.91963700   | 2.38049900  | 2.49272700  |
| H | 9.92792800   | 4.03008600  | 1.81395700  |
| C | -6.84478700  | -0.15063600 | 0.07021500  |
| C | -7.40335200  | -1.41874400 | 0.34100300  |
| C | -7.74439400  | 0.91979100  | -0.14786400 |
| C | -8.77443300  | -1.59769300 | 0.39064200  |
| H | -6.75373100  | -2.26871500 | 0.52930400  |
| C | -9.11488700  | 0.74364300  | -0.09116700 |
| H | -7.35726500  | 1.90568300  | -0.38308300 |
| C | -9.67379900  | -0.52758200 | 0.18068900  |
| H | -9.17259000  | -2.58662300 | 0.60422400  |
| H | -9.75753700  | 1.59678600  | -0.26817600 |
| C | 0.99465900   | -0.27485300 | -0.20308100 |
| C | 0.43423800   | 0.99302400  | -0.17306800 |

|   |             |             |             |
|---|-------------|-------------|-------------|
| S | -0.26628300 | -1.51992900 | -0.18940200 |
| C | -0.97629400 | 0.97553600  | -0.13290600 |
| H | 1.03946600  | 1.89266100  | -0.15088900 |
| C | -1.49948900 | -0.30943500 | -0.13190200 |
| C | -2.93131200 | -0.23196800 | -0.07897400 |
| C | -3.31598600 | 1.10319600  | -0.04859700 |
| S | -4.28140500 | -1.30622500 | -0.04637500 |
| C | -4.71253300 | 1.26704500  | 0.00356200  |
| C | -5.40815100 | 0.06376800  | 0.01522600  |
| H | -5.21239100 | 2.22804700  | 0.05373700  |
| C | -2.09214200 | 2.01878000  | -0.07657700 |
| C | -1.99881700 | 2.88026000  | 1.20251000  |
| H | -1.07729800 | 3.47357200  | 1.19976400  |
| H | -2.84555700 | 3.57357600  | 1.26196300  |
| H | -2.00237500 | 2.25486600  | 2.10040000  |
| C | -2.08642300 | 2.91991900  | -1.33158600 |
| H | -1.16513100 | 3.51200500  | -1.37461900 |
| H | -2.15442500 | 2.32305000  | -2.24620100 |
| H | -2.93313600 | 3.61552400  | -1.31016800 |

#### DTF-2P-2T-S

0 1

|   |              |             |             |
|---|--------------|-------------|-------------|
| C | 2.75633700   | -1.69374100 | 0.13179400  |
| C | 4.08728700   | -2.07517500 | 0.07195600  |
| C | 5.09623400   | -1.18901200 | -0.36401900 |
| C | 4.68278300   | 0.09456100  | -0.77923700 |
| C | 3.34838600   | 0.47436000  | -0.72951300 |
| C | 2.35138500   | -0.40278200 | -0.26088900 |
| H | 2.02079500   | -2.39967200 | 0.50824900  |
| H | 4.36611200   | -3.07700600 | 0.38908800  |
| H | 5.39884600   | 0.79368700  | -1.19692700 |
| H | 3.06802300   | 1.45811600  | -1.09396100 |
| C | -11.09588900 | -0.86991100 | 0.28213400  |
| C | -12.24485400 | -0.15807800 | 0.08418400  |
| H | -11.26035100 | -1.90890200 | 0.55410300  |
| C | -13.58358500 | -0.78860700 | 0.23829300  |
| O | -14.63614800 | -0.20890500 | 0.07733700  |
| O | -13.51802500 | -2.10163500 | 0.58364800  |
| H | -14.44418000 | -2.39741000 | 0.65386400  |
| C | 6.47285900   | -1.66411600 | -0.36966800 |
| C | 7.63534400   | -0.96988800 | -0.42909700 |
| H | 6.57863900   | -2.74546700 | -0.29262400 |
| C | -12.28951900 | 1.22405400  | -0.27872000 |
| N | -12.30911500 | 2.34985500  | -0.57359500 |

|   |             |             |             |
|---|-------------|-------------|-------------|
| S | 9.19702100  | -1.82536100 | -0.52096800 |
| S | 7.85153300  | 0.79412400  | -0.46156600 |
| C | 10.21711600 | -0.42514800 | -0.11963700 |
| C | 9.59978200  | 0.78122100  | -0.09498700 |
| S | 11.95831600 | -0.68167200 | 0.05231200  |
| S | 10.38753000 | 2.34756700  | 0.12795500  |
| C | 12.02463500 | -1.98346900 | 1.34712200  |
| H | 11.54840500 | -2.90904600 | 1.01775800  |
| H | 13.08856200 | -2.16964300 | 1.51687300  |
| H | 11.56737500 | -1.63298900 | 2.27490600  |
| C | 9.64558000  | 2.90823700  | 1.71404900  |
| H | 8.55632800  | 2.94971800  | 1.64962700  |
| H | 9.95110000  | 2.25613500  | 2.53506900  |
| H | 10.03482600 | 3.91544200  | 1.88588000  |
| C | -6.89812300 | 0.02960300  | 0.09083100  |
| C | -7.38565200 | -1.25029600 | 0.42585600  |
| C | -7.84835500 | 1.03563700  | -0.19607300 |
| C | -8.74640600 | -1.50188500 | 0.47331300  |
| H | -6.69086300 | -2.04846700 | 0.67074100  |
| C | -9.20875000 | 0.78775800  | -0.14050200 |
| H | -7.50989500 | 2.02426000  | -0.48877900 |
| C | -9.69845300 | -0.49537700 | 0.19721600  |
| H | -9.09272600 | -2.49759900 | 0.73880500  |
| H | -9.89530900 | 1.59217400  | -0.37212500 |
| C | 0.95421900  | 0.02189000  | -0.19980500 |
| C | 0.45677900  | 1.30691100  | -0.12657000 |
| S | -0.35389000 | -1.17630000 | -0.22553700 |
| C | -0.95842400 | 1.33789700  | -0.08505100 |
| H | 1.09074100  | 2.18380700  | -0.07271700 |
| C | -1.55554500 | 0.07707100  | -0.12262600 |
| C | -2.96853400 | 0.14359300  | -0.06577000 |
| C | -3.44246200 | 1.45550200  | 0.01151500  |
| S | -4.28161400 | -0.99385300 | -0.07101300 |
| C | -4.85085600 | 1.55441600  | 0.07023800  |
| C | -5.47085500 | 0.31961800  | 0.04001300  |
| H | -5.39326300 | 2.48802500  | 0.16009000  |
| S | -2.13894200 | 2.63869000  | 0.02327100  |

DTF-2P-2T-Bi

0 1

|   |             |             |             |
|---|-------------|-------------|-------------|
| C | -2.33076100 | -0.10923000 | -0.72451100 |
| C | -3.70459400 | -0.30868000 | -0.74011400 |
| C | -4.29025200 | -1.42703100 | -0.10999100 |
| C | -3.41306300 | -2.34584600 | 0.50625300  |

|   |              |             |             |
|---|--------------|-------------|-------------|
| C | -2.04245900  | -2.14274200 | 0.53077100  |
| C | -1.46413700  | -1.01182700 | -0.07862800 |
| H | -1.91719100  | 0.74421000  | -1.25355300 |
| H | -4.31774300  | 0.39152800  | -1.29671800 |
| H | -3.82736700  | -3.22586300 | 0.99198000  |
| H | -1.41070000  | -2.86029100 | 1.04743900  |
| C | -5.71892000  | -1.70591400 | -0.06622200 |
| C | -6.77502100  | -0.88349300 | -0.27864200 |
| S | -6.74794000  | 0.85862200  | -0.62962800 |
| S | -8.43881600  | -1.52430100 | -0.25521500 |
| C | -8.48175400  | 1.14629400  | -0.30957500 |
| C | -9.25802200  | 0.04918400  | -0.13411100 |
| S | -9.04947600  | 2.81802100  | -0.38885200 |
| S | -11.01764800 | 0.06788100  | 0.03924700  |
| C | -8.25253600  | 3.54583000  | 1.09970200  |
| H | -7.16710800  | 3.43201600  | 1.06338400  |
| H | -8.50404700  | 4.60975300  | 1.08342200  |
| H | -8.65005500  | 3.09275900  | 2.01037800  |
| C | -11.26751100 | -1.00395000 | 1.51024800  |
| H | -10.94168500 | -2.02970300 | 1.32688000  |
| H | -10.75313800 | -0.59474800 | 2.38240000  |
| H | -12.34565900 | -0.99884700 | 1.69189500  |
| H | -5.97192200  | -2.73115200 | 0.20066600  |
| C | -0.02165100  | -0.77559500 | -0.05918900 |
| C | 0.64297400   | 0.42594200  | -0.19818900 |
| S | 1.11034000   | -2.12435200 | 0.15189900  |
| C | 2.04924300   | 0.27086200  | -0.13024000 |
| H | 0.13253900   | 1.37489700  | -0.30997600 |
| C | 2.47517000   | -1.04291900 | 0.06074900  |
| C | 3.87855100   | -1.19541000 | 0.13938800  |
| S | 3.41071000   | 1.35339000  | -0.21765300 |
| C | 4.54586100   | 0.00765300  | 0.00978500  |
| C | 5.98440000   | 0.24133300  | 0.04270500  |
| C | 6.52479300   | 1.52433100  | 0.26589100  |
| C | 6.89235300   | -0.82457700 | -0.14919400 |
| C | 7.89488000   | 1.72251900  | 0.29779400  |
| H | 5.86338500   | 2.36914700  | 0.43463900  |
| C | 8.26183900   | -0.62958600 | -0.10905500 |
| H | 6.51345200   | -1.82051400 | -0.35429200 |
| C | 8.80441100   | 0.65695200  | 0.11597300  |
| H | 8.28233800   | 2.72261800  | 0.47559800  |
| H | 8.91430200   | -1.47935800 | -0.26472600 |
| C | 10.21621000  | 0.97898300  | 0.17287000  |
| C | 11.33434000  | 0.20499500  | 0.04281800  |

|   |             |             |             |
|---|-------------|-------------|-------------|
| H | 10.42399600 | 2.03014600  | 0.35280000  |
| C | 11.32098900 | -1.20452300 | -0.19625900 |
| N | 11.29361100 | -2.35185300 | -0.39033800 |
| C | 12.69840000 | 0.78983500  | 0.14484600  |
| O | 13.72557000 | 0.15429500  | 0.04004300  |
| O | 12.68880200 | 2.13015700  | 0.37116100  |
| H | 13.62680600 | 2.39122600  | 0.41754500  |
| H | 4.38240500  | -2.13894500 | 0.31097600  |

1. K. P. Guo; K. Y. Yan; X. Q. Lu; Y. C. Qiu; Z. K. Liu; J. W. Sun; F. Yan; W. Y. Guo; S. H. Yang, *Org Lett* 2012, **14**, 2214.
